# Supplementary material for: Selective dual-side functionalization of hollow SiO2 micropillar arrays for biotechnological applications
Source: Royal Society of Chemistry journal article supplement (doi:10.1039/c3ra48062c), 2014-01-01
Supplement: c3ra48062c1.pdf [file c3ra48062c1.pdf]

## Electronic Supplementary Information

# Selective dual-side functionalization of hollow SiO<sub>2</sub> micropillar arrays for biotechnological applications

*María Alba, Elisabetta Romano, Pilar Formentín, Pinkie J. Eravuchira, Josep Ferré-Borrull, Josep*

*Pallarès, Lluís F. Marsal\**

Departament Departament d'Enginyeria Electrònica, Elèctrica i Automàtica, Universitat

Rovira i Virgili, Avda Països Catalans 26, 43007 Tarragona (Spain).

\*Address correspondence to [lluis.marsal@urv.cat](mailto:lluis.marsal@urv.cat)

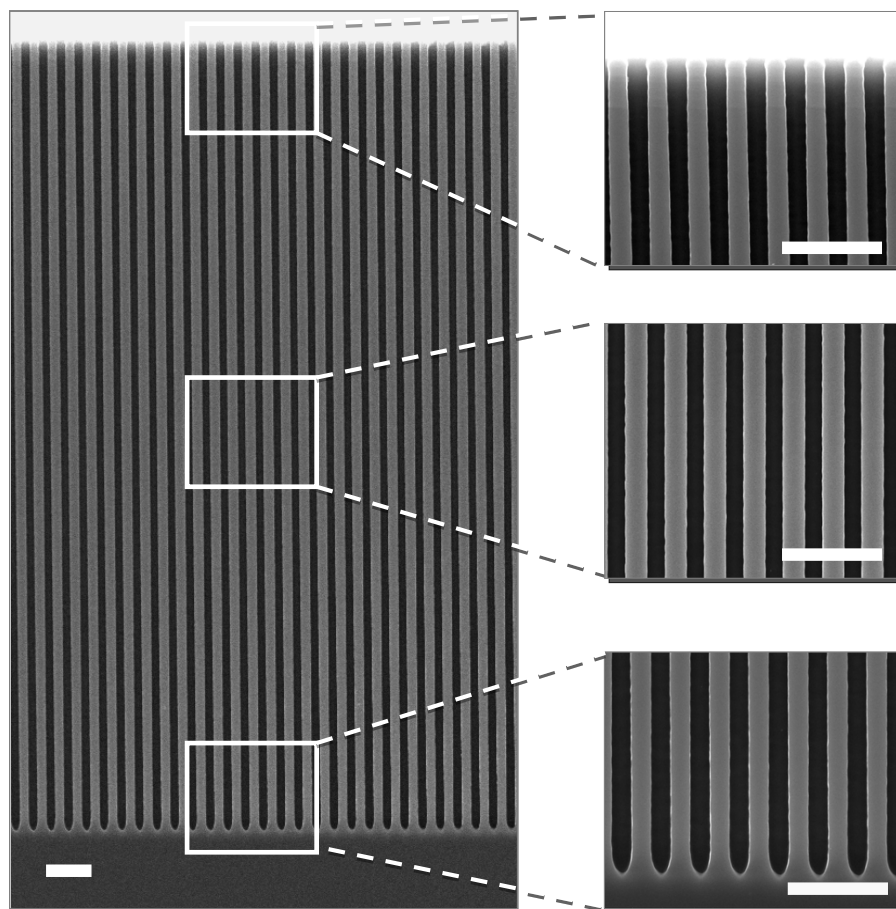

**Fig. S1.** Cross-view SEM micrograph of a 150  $\mu\text{m}$ -thick macroporous silicon. Zoomed images at different depths display uniform pores in diameter and smooth wall surfaces. Scale bar: 10  $\mu\text{m}$ .

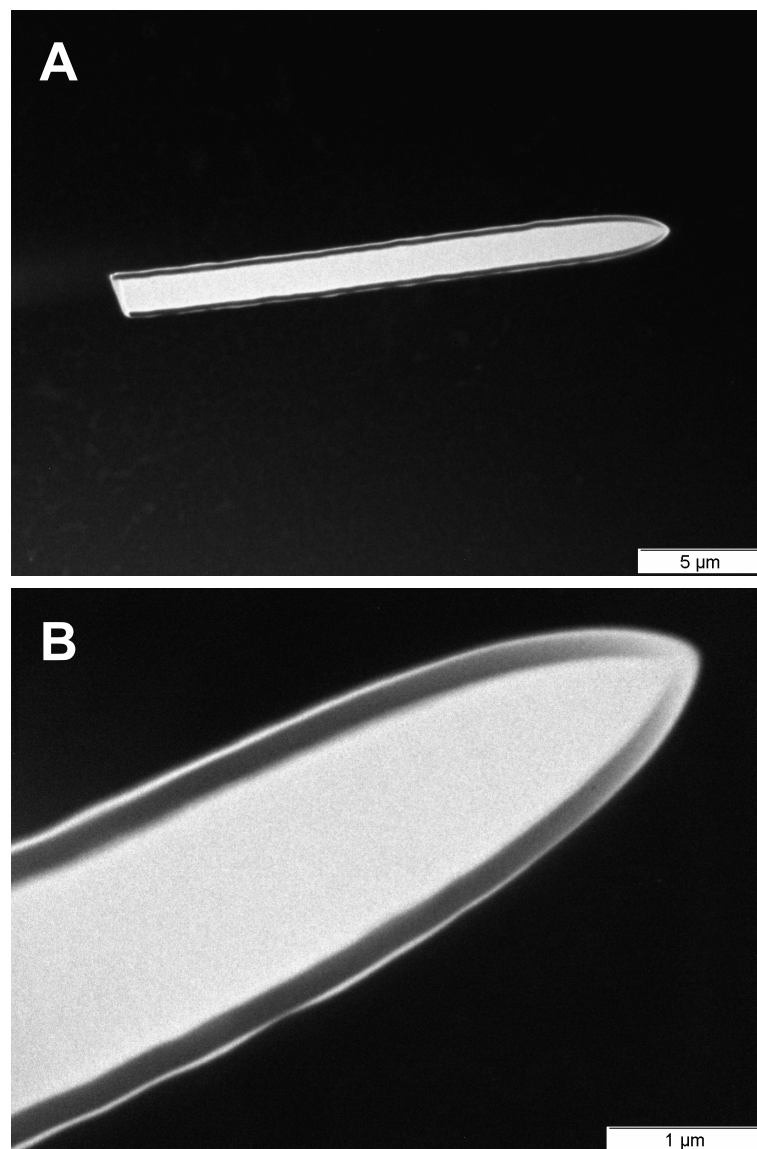

**Fig. S2.** Dark-field TEM images of A) a single broken micropillar, showing a uniform SiO<sub>2</sub> wall and a hollow structure; B) a detail of the micropillar tip

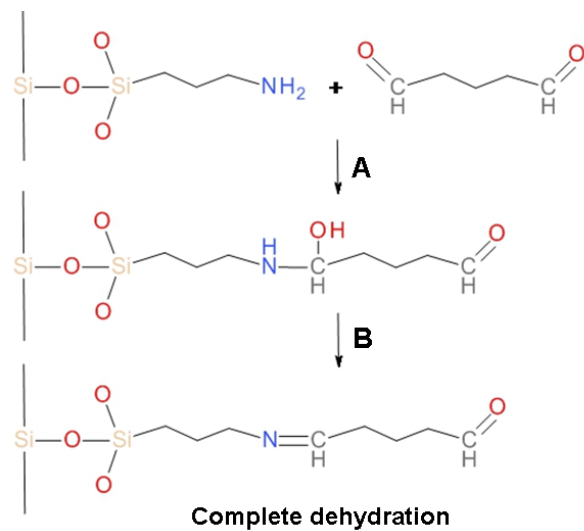

**Fig. S3.** Schematic representation of the GTA reaction onto APTES. A) Partial dehydration of the primary amine into a secondary amine; B) complete dehydration of the secondary amine into an imine group.

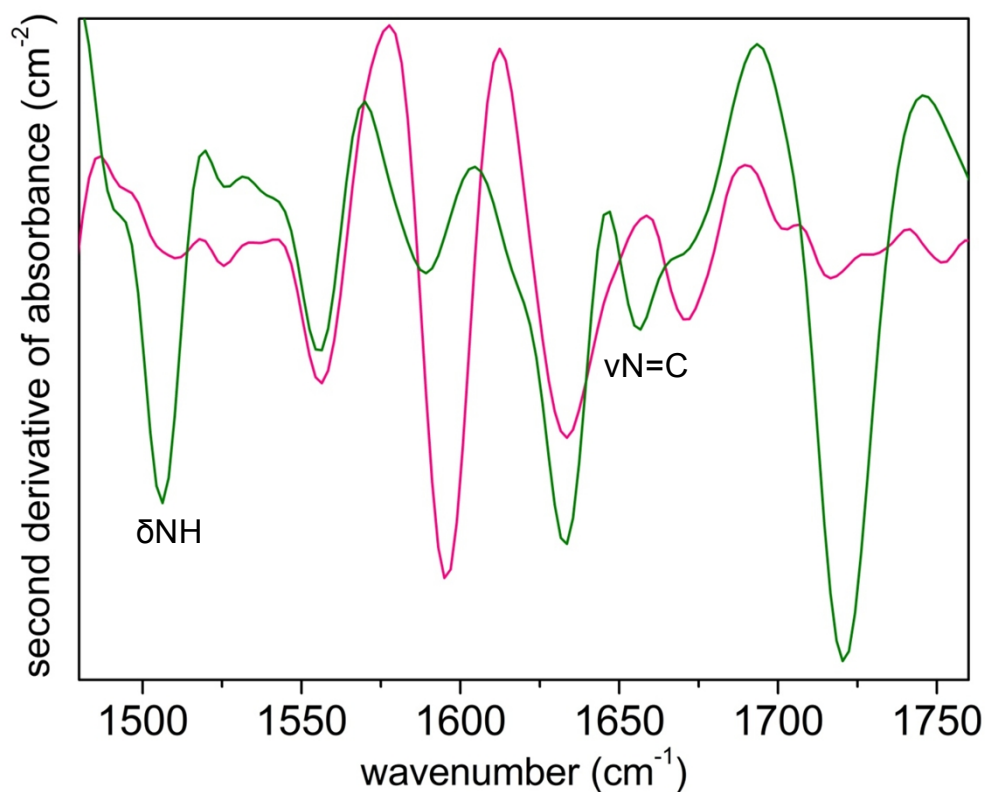

**Fig. S4.** Second derivative FT-IR spectra of a nanoporous sample after functionalization with APTES (green line) and subsequent GTA docking (pink line). The minimum at 1506 cm<sup>-1</sup> falls in the region of the secondary amine secondary amine  $\delta$ NH (1490-1580 cm<sup>-1</sup>), whereas the minimum at 1656 cm<sup>-1</sup> is in the region of  $\nu$ N=C(1660-1675 cm<sup>-1</sup>). Assuming these assignments are correct, this implies there is equilibrium in the GTA docking on APTES between the partially and completely dehydrated forms.

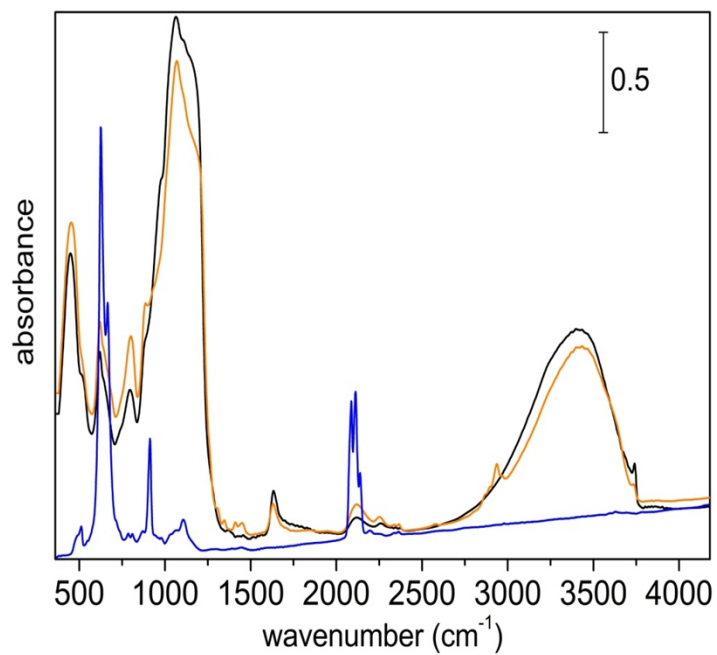

**Fig. S5.** FT-IR spectra of a nanoporous sample freshly etched (H-terminated, blue line), after oxidation (OH-terminated, black line) and after MPTMS functionalization (SH-terminated, orange line).

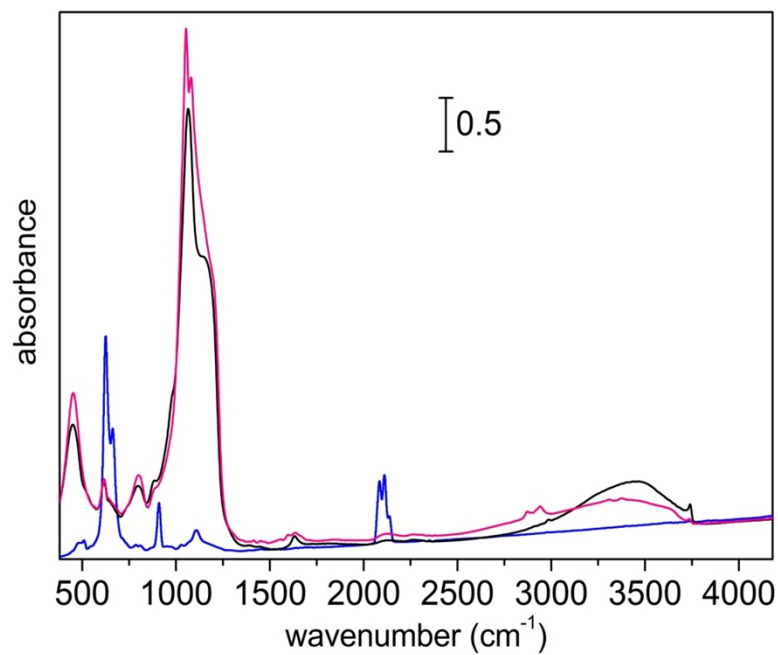

**Fig. S6.** FT-IR spectra of a nanoporous sample freshly etched (H-terminated, blue line), after oxidation (OH-terminated, black line) and after MPMS functionalization (NH<sub>2</sub>-terminated, pink line).
